# Supplementary material
Source: PubMed Central journal article supplement (PMC8497953)
Supplement: mmc1.pdf [file mmc1.pdf]

# Study of perinatal transmission of SARS-CoV-2 in a Mexican public hospital

Adriana Ramírez-Rosas, Tizziani Benitez-Guerrero, Karina Corona-Cervantes, Juan Manuel Vélez-Ixta, Norma Gabriela Zavala-Torres, Jazmin Cuenca-Leija, Sarahi Martínez- Pichardo, María Esther Landero-Montes-de-Oca, Fernando Guadalupe Bastida-González, Paola Berenice Zárate-Segura, Jaime García-Mena.

## Supplementary material

**Table S1**

Detection of SARS-CoV-2 RNA by qPCR in nasopharyngeal swabs and human milk samples.

| Sample                      | N                | Positive    | Negative     |
|-----------------------------|------------------|-------------|--------------|
| mother nasopharyngeal swab  | 133              | 16 (12.03%) | 117 (87.97%) |
| colostrum/human milk sample | 140              | 3 (2.14%)   | 137 (97.86%) |
| neonate nasopharyngeal swab | 131 <sup>a</sup> | 11 (8.40%)  | 120 (91.60%) |

**Table S2**

Detection of SARS-CoV-2 RNA by ddPCR in nasopharyngeal swabs and human milk samples.

| Sample                      | N   | Positive    | negative     |
|-----------------------------|-----|-------------|--------------|
| mother nasopharyngeal swab  | 133 | 41 (30.83%) | 92 (69.17%)  |
| colostrum/human milk sample | 140 | 20 (14.29%) | 120 (85.71%) |
| neonate nasopharyngeal swab | 131 | 24 (18.32%) | 107 (81.68%) |
